# Supplementary material for: The effect of tofacitinib on residual pain in patients with rheumatoid arthritis and psoriatic arthritis
Source: HighWire-hosted journal article supplement (doi:10.1136/rmdopen-2022-002478), 2022-09-01
Supplement: rmdopen-2022-002478supp001_data_supplement.pdf [file rmdopen-2022-002478supp001_data_supplement.pdf]

## SUPPLEMENTAL MATERIAL

### Supplemental methods

#### Model specification

Bayesian network meta-analysis (BNMA) using individual patient-level data was used to perform mixed-treatment comparisons (combining direct and indirect comparisons). BNMA allows combination of the evidence from all relevant (direct and indirect) treatment comparisons in a single statistical model<sup>1</sup>:

$$y_{ijk} = \begin{cases} L(\mu_{ijk}, \sigma_i^2) & 0 \leq y_{ijk} \leq 100 \\ 0 & \text{otherwise} \end{cases}$$

$$\mu_{ijk} = \alpha_{ij} + \sum_{il} \beta_{il} x_{ijkl}$$

$$\alpha_{ij} = \alpha_j + \vartheta_{ij}$$

$$(\vartheta_{i1}, \vartheta_{i2}, \dots, \vartheta_{ij}) \sim MVN(0, \Sigma_j)$$

where y is the outcome, x the covariates, i indicates the study, j the treatment, k the patient and l the covariate.

To complete the model specification within the Bayesian framework, we assigned a uniform prior distribution HN(10) for the square root of the between-trial ( $\tau^2$ ) and within-trial ( $\sigma_{ij}^2$ ) variance parameters. The prior distribution for the regression coefficients was N (0,  $10^2$ ).

The model specified above is a random-effects network meta-regression adjusting for participant-level effect modifiers. This model can be easily simplified in a fixed-effects model by removing the study specific  $\vartheta_{ij}$ .

All analyses were implemented in R and Just Another Gibbs Sampler (JAGS) and were based on 4 chains. For each chain, we allowed 7000 adaptation samples and a burn-in period of 2000 samples to ensure that convergence was reached.

Inferences were based on posterior distribution (mean, median, 95% credible interval, posterior probability of a larger pain reduction). The summary treatment effects were calculated as  $d(\text{tofacitinib-placebo})$ ,  $d(\text{adalimumab-placebo})$  and  $d(\text{tofacitinib-adalimumab})$  as well as the posterior probability of a larger pain reduction,  $p(d(\text{tofacitinib-placebo}) < 0)$ ,  $p(d(\text{adalimumab-placebo}) < 0)$ ,  $p(d(\text{tofacitinib-adalimumab}) < 0)$ .

## Model selection

Departure from normality was observed in the primary endpoint; Patient's Assessment of Arthritis Pain at Month 3 (supplemental figure 1). Several parametric distributions were investigated: skew normal; truncated t (with 4 degrees of freedom); truncated Laplace; exponential; and gamma. The selection between different distributions was performed using the deviance information criterion (DIC) that combines a Bayesian measure of fit with a measure of model complexity, and based on providing clinically meaningful results. Models with smaller DIC are better supported by the data. One of the best-fitting models was achieved by assuming a truncated Laplace distribution of the primary endpoint: Patient's Assessment of Arthritis Pain at Month 3 (supplemental table 1).

**Supplemental tables**

**Supplemental table 1** Deviance information criterion of the parametric distributions investigated for the Bayesian network meta-analysis fixed-effects model used for the primary endpoint: Patient's Assessment of Arthritis Pain at Month 3

| Distribution      | Deviance information criterion |
|-------------------|--------------------------------|
| Skew normal       | 14617.7                        |
| Truncated t       | 11699.5                        |
| Truncated Laplace | 4913.9                         |
| Exponential       | 4770.1                         |
| Gamma             | 4412.4                         |

**Supplemental table 2**    Proportion of patients with an abrogation of inflammation<sup>a</sup> after 3 months of therapy by indication and study

|                                                        | Tofacitinib | Adalimumab | Placebo  | Total      |
|--------------------------------------------------------|-------------|------------|----------|------------|
|                                                        | 5 mg BID    | 40 mg Q2W  |          |            |
| <b>Pooled rheumatoid arthritis/psoriatic arthritis</b> |             |            |          |            |
| Full analysis population, N                            | 2568        | 691        | 909      | 4168       |
| Patients with abrogation of inflammation, N (%)        | 382 (14.9)  | 118 (17.1) | 50 (5.5) | 550 (13.2) |
| <b>Rheumatoid arthritis</b>                            |             |            |          |            |
| Full analysis population, N                            | 2330        | 585        | 673      | 3588       |
| Patients with abrogation of inflammation, N (%)        | 328 (14.1)  | 87 (14.9)  | 20 (3.0) | 435 (12.1) |
| <b>ORAL Step (NCT00960440)</b>                         |             |            |          |            |
| Full analysis population, N                            | 133         | –          | 132      | 265        |
| Patients with abrogation of inflammation, N (%)        | 17 (12.8)   | –          | 0 (0.0)  | 17 (6.4)   |
| <b>ORAL Scan (NCT00847613)</b>                         |             |            |          |            |
| Full analysis population, N                            | 316         | –          | 156      | 472        |

|                                                 |           |          |         |           |
|-------------------------------------------------|-----------|----------|---------|-----------|
| Patients with abrogation of inflammation, N (%) | 35 (11.1) | –        | 5 (3.2) | 40 (8.5)  |
| <b>ORAL Solo (NCT00814307)</b>                  |           |          |         |           |
| Full analysis population, N                     | 241       | –        | 122     | 363       |
| Patients with abrogation of inflammation, N (%) | 30 (12.4) | –        | 8 (6.6) | 38 (10.5) |
| <b>ORAL Sync (NCT00856544)</b>                  |           |          |         |           |
| Full analysis population, N                     | 312       | –        | 158     | 470       |
| Patients with abrogation of inflammation, N (%) | 42 (13.5) | –        | 3 (1.9) | 45 (9.6)  |
| <b>ORAL Standard (NCT00853385)</b>              |           |          |         |           |
| Full analysis population, N                     | 198       | 199      | 105     | 502       |
| Patients with abrogation of inflammation, N (%) | 19 (9.6)  | 12 (6.0) | 4 (3.8) | 35 (7.0)  |
| <b>ORAL Start (NCT01039688)</b>                 |           |          |         |           |
| Full analysis population, N                     | 370       | –        | –       | 370       |
| Patients with abrogation of inflammation, N (%) | 62 (16.8) | –        | –       | 62 (16.8) |
| <b>ORAL Strategy (NCT02187055)</b>              |           |          |         |           |
| Full analysis population, N                     | 760       | 386      | –       | 1146      |

|                                                 |            |           |           |            |
|-------------------------------------------------|------------|-----------|-----------|------------|
| Patients with abrogation of inflammation, N (%) | 123 (16.2) | 75 (19.4) | –         | 198 (17.3) |
| <b>Psoriatic arthritis</b>                      |            |           |           |            |
| Full analysis population, N                     | 238        | 106       | 236       | 580        |
| Patients with abrogation of inflammation, N (%) | 54 (22.7)  | 31 (29.2) | 30 (12.7) | 115 (19.8) |
| <b>OPAL Broaden (NCT01877668)</b>               |            |           |           |            |
| Full analysis population, N                     | 107        | 106       | 105       | 318        |
| Patients with abrogation of inflammation, N (%) | 23 (21.5)  | 31 (29.2) | 13 (12.4) | 67 (21.1)  |
| <b>OPAL Beyond (NCT01882439)</b>                |            |           |           |            |
| Full analysis population, N                     | 131        | –         | 131       | 262        |
| Patients with abrogation of inflammation, N (%) | 31 (23.7)  | –         | 17 (13.0) | 48 (18.3)  |

<sup>a</sup>An abrogation of inflammation defined as SJC=0 and CRP <6 mg/L.

BID, twice weekly; CRP, C-reactive protein; N, number of patients; Q2W, once every 2 weeks; SJC, swollen joint count.

Supplemental figure

Supplemental figure 1      Distribution of the Patient’s Assessment of Arthritis Pain at Month 3

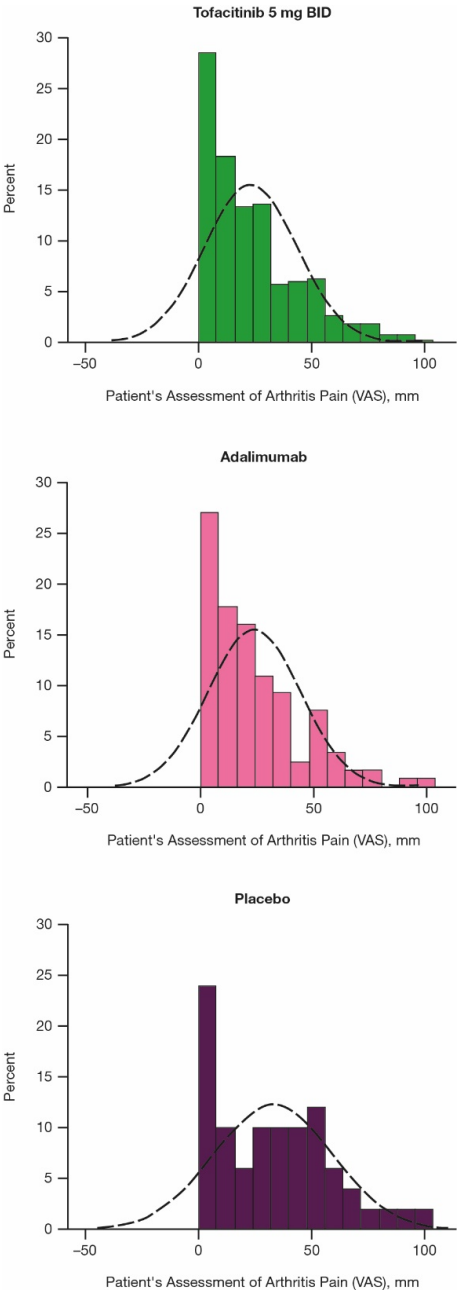

Dashed line indicates a normal distribution.

BID, twice weekly; VAS, visual analogue scale

### Supplemental reference

- 1 Zhang J, Carlin BP, Neaton JD, et al. Network meta-analysis of randomized clinical trials: reporting the proper summaries. *Clin Trials* 2014;11:246–62.  
doi:10.1177/1740774513498322.
